# Supplementary material for: Clinical impact of human papillomavirus in laryngeal squamous cell carcinoma: a retrospective study
Source: PeerJ. 2017 May 30;5:e3395. doi: 10.7717/peerj.3395 (PMC5452968; doi:10.7717/peerj.3395)
Supplement: Supplemental Information 1 [file peerj-05-3395-s001.xlsx]

## Sheet: Raw data
Chart No.	Age	Age_Group	Gender	Diagnosis_Date	Tumor_Subsites	Glottic_NonGlottic	Tumor_differentiation	Smoking	Betelnut	Drinking	Esophageal cancer	Lung cancer	Second primary cancer	T1234	N01	Extranodal_extension	TNM1234	Primary_Treatment_Date	Adjuvant_Therapy	HPV	HPV16	HPV58	HPV18	Latest_F/U_or_Death_Date	Death	Death_On_Dix	Recurrence	Recurrence_Date	Survival_Time(M)	Relapse_free_Time(M)
5145xxx	65	1	1	2007-12-17	1	1	1	1	0	0	0	0	0	1	0		1	2007-12-31	0	0				2016-07-06	0	0	0		104.13	103.67
5145xxx	71	1	1	2006-12-12	1	1	2	1	0	0	0	0	0	1	0		1	2006-12-13	0	1	1			2009-02-13	1	0	0		26.47	26.43
5284xxx	69	1	1	2007-02-07	1	1	1	1	0	0	0	0	0	1	0		1	2007-02-27	0	0				2008-06-22	1	0	0		16.7	16.03
5317xxx	54	0	1	2009-06-16	1	1	2	1	0	1	0	0	0	1	0		1	2009-07-06	0	0				2016-07-13	0	0	1	2010-02-03	86.13	7.07
5353xxx	80	1	1	2007-04-17	1	1	2	1	0	0	0	0	0	1	0		1	2007-05-03	0	0				2012-02-04	1	1	1	2010-08-16	58.47	40.03
5494xxx	55	0	1	2009-12-17	2	0	2	1	1	1	0	0	0	3	1	1	3	2010-03-04	2	0				2016-06-27	0	0	0		79.47	76.9
5503xxx	50	0	1	2009-07-14	2	0	2	1	0	1	0	0	1	1	0		1	2009-07-16	0	0				2016-05-09	0	0	0		83.03	82.97
5517xxx	38	0	1	2009-12-16	2	0	2	1	1	1	0	0	0	1	1	2	3	2010-01-27	2	0				2015-07-14	0	0	0		67.87	66.47
5531xxx	51	0	1	2009-03-30	2	0	2	0	1	0	0	0	1	1	1	2	3	2009-04-20	0	1	1			2016-07-13	0	0	0		88.73	88.03
5551xxx	59	0	1	2008-09-30	2	0	2	1	1	1	0	0	0	1	0		1	2008-10-23	2	1	1			2011-12-21	1	0	0		39.23	38.47
5584xxx	51	0	1	2008-03-25	1	1	2	1	1	0	0	0	0	1	0		1	2008-05-13	2	0				2016-07-14	0	0	0		101.1	99.47
5606xxx	58	0	1	2007-12-07	1	1	2	1	1	1	0	0	0	3	0		3	2008-01-02	0	0				2016-06-23	0	0	0		104.03	103.17
5607xxx	75	1	1	2006-07-04	1	1	2	0	0	0	0	0	0	1	0		1	2006-08-17	0	0				2009-01-31	1	0	0		31.4	29.93
5633xxx	63	1	1	2006-01-17	1	1	1	1	1	0	0	0	0	1	0		1	2006-02-13	0	0				2016-07-05	0	0	1	2011-09-05	127.4	67.67
5640xxx	65	1	1	2009-11-18	2	0	2	1	1	1	0	0	0	3	1	2	3	2009-12-10	2	0				2016-07-11	0	0	0		80.9	80.17
5652xxx	58	0	1	2007-09-07	2	0	2	1	1	1	1	0	1	1	1	1	3	2007-10-15	2	0				2016-07-04	0	0	0		107.43	106.17
5662xxx	68	1	1	2008-12-29	1	1	2	1	0	1	0	0	0	1	0		1	2009-01-13	0	0				2016-07-11	0	0	0		91.7	91.2
5775xxx	39	0	1	2008-11-28	2	0	2	1	0	1	0	0	0	3	1	2	3	2008-12-16	2	0				2009-06-27	1	1	0		7.03	6.43
6094xxx	74	1	1	2008-05-16	1	1	2	1	0	0	0	0	0	1	0		1	2008-06-30	0	0				2013-03-12	0	0	0		58.7	57.2
6166xxx	47	0	1	2006-07-01	2	0	1	1	0	0	0	0	0	1	0		1	2006-08-28	0	0				2016-07-14	0	0	0		122.2	120.27
6230xxx	60	1	1	2008-06-27	1	1	2	1	0	0	0	0	0	1	0		1	2008-07-07	0	0				2016-07-07	0	0	0		97.73	97.4
6230xxx	71	1	1	2009-06-17	2	0	2	1	0	0	0	0	0	1	1	1	3	2009-09-14	2	0				2016-07-12	0	0	0		86.07	83.1
6238xxx	63	1	1	2007-05-23	3	0	2	1	1	1	0	0	1	3	0		3	2007-05-29	2	1	1	1		2008-10-30	1	0	0		17.53	17.33
6400xxx	66	1	1	2007-02-26	4	0	2	1	1	0	0	1	1	3	1	2	3	2007-04-20	0	0				2010-12-01	1	0	0		45.8	44.03
6456xxx	63	1	1	2009-04-30	1	1	2	1	0	0	0	0	0	1	0		1	2009-05-12	0	0				2011-05-01	1	0	0		24.37	23.97
6458xxx	51	0	1	2009-01-13	1	1	2	1	0	0	0	0	0	1	0		1	2009-02-15	0	1	1			2016-05-03	0	0	0		88.9	87.8
6538xxx	49	0	1	2009-12-30	2	0	2	1	1	0	0	0	0	1	1	1	3	2010-01-18	2	0				2016-02-19	0	0	0		74.73	74.1
6654xxx	75	1	1	2006-04-18	1	1	2	1	1	0	0	0	0	1	0		1	2006-05-01	0	0				2011-01-10	1	0	0		57.6	57.17
6659xxx	67	1	1	2008-11-28	2	0	2	1	1	1	0	0	0	1	0		1	2009-01-06	0	1	1			2014-02-17	0	0	0		63.57	62.27
6712xxx	85	1	1	2006-01-23	1	1	2	1	1	1	0	0	0	1	0		1	2006-02-13	2	0				2016-01-08	0	0	0		121.23	120.53
6751xxx	70	1	1	2007-03-16	1	1	1	1	0	1	0	0	0	1	0		1	2007-04-16	0	0				2016-02-16	0	0	0		108.63	107.6
6784xxx	82	1	0	2008-04-22	2	0	1	1	0	0	0	0	0	3	1	1	3	2008-05-06	0	0				2010-03-15	1	1	1	2009-03-01	23.07	9.97
6788xxx	57	0	1	2009-01-09	1	1	1	1	0	0	0	0	0	1	0		1	2009-01-12	0	0				2014-05-26	0	0	0		65.43	65.33
6905xxx	56	0	1	2006-09-01	2	0	2	0	1	0	0	0	1	1	0		1	2006-09-21	0	0				2016-06-24	0	0	0		119.47	118.8
6952xxx	45	0	1	2007-10-22	1	1	2	1	0	0	0	0	0	1	0		1	2007-11-19	0	0				2016-05-12	0	0	0		104.17	103.23
9107xxx	80	1	1	2008-12-25	1	1	1	1	0	0	0	0	0	1	0		1	2009-01-16	0	0				2016-07-14	0	0	1	2013-05-29	91.93	53.13
9125xxx	47	0	1	2006-12-26	1	1	1	1	1	1	0	0	0	1	0		1	2007-02-26	0	0				2014-12-31	0	0	0		97.57	95.5
9197xxx	65	1	1	2009-08-05	2	0	1	1	1	1	0	1	1	3	1	2	3	2009-08-27	2	0				2012-05-26	1	0	0		34.17	33.43
9351xxx	69	1	1	2009-07-14	2	0	2	1	1	0	0	0	0	1	1	2	3	2009-07-27	0	0				2013-06-17	1	1	1	2009-12-17	47.8	4.77
9371xxx	62	1	1	2009-02-11	2	0	1	1	1	0	0	0	1	3	0		3	2009-03-04	2	1	1			2014-04-07	0	0	0		62.7	62
9407xxx	65	1	1	2008-06-20	1	1	2	1	1	1	0	0	0	1	0		1	2008-07-16	0	0				2016-07-14	0	0	0		98.2	97.33
6001xxxx	79	1	1	2009-11-01	1	1	2	1	0	0	0	0	0	1	0		1	2009-11-02	0	0				2014-12-31	0	0	0		62.87	62.83
6002xxxx	60	1	1	2008-09-30	1	1	1	1	1	0	0	0	0	1	0		1	2008-10-15	0	1	1			2016-07-12	0	0	0		94.73	94.23
6005xxxx	67	1	1	2006-01-24	1	1	2	1	0	1	0	0	0	1	0		1	2006-03-08	0	0				2016-06-03	0	0	0		126.1	124.67
6007xxxx	81	1	1	2006-02-06	4	0	1	1	0	1	0	0	0	3	0		3	2006-03-02	0	0				2013-04-10	0	0	0		87.33	86.53
6010xxxx	58	0	1	2007-05-02	1	1	2	1	1	0	0	0	0	1	0		1	2007-05-11	2	0				2013-06-21	0	0	0		74.73	74.43
6016xxxx	68	1	1	2006-06-16	1	1	1	1	1	1	0	0	0	1	0		1	2006-07-19	0	0				2016-06-28	0	0	0		122.17	121.07
6020xxxx	56	0	1	2006-07-28	1	1	1	1	1	0	0	0	0	1	0		1	2006-08-17	0	0				2016-07-12	0	0	1	2007-06-13	121.23	10
6026xxxx	72	1	1	2006-03-07	1	1	2	1	0	1	0	0	0	1	0		1	2006-03-23	0	0				2015-07-09	0	0	1	2010-02-25	113.7	47.83
6026xxxx	61	1	1	2006-03-13	1	1	2	1	0	1	0	0	1	1	0		1	2006-04-12	0	0				2015-07-21	0	0	1	2006-08-17	113.9	4.23
6028xxxx	52	0	1	2006-12-11	1	1	2	1	0	1	0	0	0	1	0		1	2006-12-14	0	0				2008-02-21	1	1	1	2007-03-19	14.57	3.17
6028xxxx	52	0	1	2008-11-03	2	0	2	1	0	0	0	0	0	1	0		1	2008-11-04	0	0				2016-07-18	0	0	0		93.8	93.77
6029xxxx	55	0	1	2006-02-16	1	1	2	1	0	0	0	0	0	1	0		1	2006-02-16	0	0				2016-07-12	0	0	0		126.63	126.63
6029xxxx	83	1	1	2006-02-15	2	0	1	0	0	0	0	0	0	1	0		1	2008-11-25	0	0				2009-05-20	1	0	0		39.67	5.87
6029xxxx	49	0	1	2006-02-17	1	1	1	1	0	1	0	0	0	3	0		3	2006-03-13	0	0				2010-12-22	0	0	0		58.97	58.17
6030xxxx	72	1	1	2006-04-25	4	0	2	1	0	0	0	0	0	3	1	2	3	2006-05-15	0	0				2009-06-02	1	1	1	2008-10-13	37.8	29.4
6030xxxx	82	1	1	2006-05-05	2	0	2	1	1	1	0	0	0	3	1	2	3	2006-05-08	0	0				2006-11-01	1	1	1	2006-07-28	6	2.7
6031xxxx	49	0	1	2006-06-30	1	1	2	1	1	1	1	0	1	1	0		1	2006-07-25	0	0				2012-06-20	1	0	0		72.73	71.9
6031xxxx	57	0	1	2006-06-30	2	0	2	1	1	1	1	0	1	1	0		1	2006-07-11	0	0				2007-09-12	1	0	0		14.63	14.27
6032xxxx	54	0	0	2006-07-17	1	1	2	0	0	0	0	0	0	1	0		1	2006-08-14	0	0				2016-04-01	0	0	1	2007-11-26	118.2	15.63
6032xxxx	76	1	1	2006-08-15	2	0	2	1	0	0	0	0	0	3	1	1	3	2006-09-06	0	1	1			2008-10-05	1	0	0		26.07	25.33
6032xxxx	52	0	1	2006-08-02	2	0	2	1	1	1	0	0	0	3	0		3	2006-11-21	2	0				2008-10-06	1	1	1	2007-11-12	26.53	11.87
6032xxxx	46	0	1	2006-09-20	2	0	1	1	0	1	1	0	1	1	0		1	2006-10-12	0	0				2011-08-23	1	0	0		59.93	59.2
6032xxxx	56	0	1	2006-09-26	2	0	2	1	1	0	0	0	0	3	0		3	2006-10-09	0	0				2016-06-27	0	0	1	2007-05-10	118.73	7.1
6032xxxx	52	0	1	2006-10-12	2	0	2	1	1	0	0	0	0	3	1	2	3	2006-10-26	2	0				2016-07-01	0	0	0		118.33	117.87
6033xxxx	74	1	1	2006-11-08	4	0	2	1	0	0	0	0	0	3	0		3	2006-12-29	0	0				2009-11-09	1	1	1	2007-03-09	36.57	2.33
6033xxxx	48	0	1	2006-11-06	1	1	1	1	1	0	0	0	0	3	0		3	2006-12-13	0	0				2016-07-15	0	0	0		117.97	116.73
6033xxxx	55	0	1	2006-12-22	2	0	2	1	1	1	0	0	1	1	0		1	2007-01-10	0	0				2016-05-30	0	0	1	2007-10-18	114.9	9.37
6033xxxx	52	0	1	2006-12-26	1	1	2	1	0	0	0	0	0	1	0		1	2007-01-11	0	0				2016-06-03	0	0	0		114.9	114.37
6034xxxx	52	0	1	2006-12-12	4	0	2	1	1	1	0	0	0	3	1	1	3	2007-01-15	0	0				2016-06-27	0	0	0		116.17	115.03
6034xxxx	73	1	1	2007-03-07	4	0	1	1	1	0	0	0	0	3	0		3	2008-07-15	2	0				2015-04-23	0	0	0		98.97	82.43
6034xxxx	51	0	1	2007-03-29	4	0	1	1	1	1	0	0	0	3	0		3	2007-05-28	0	0				2016-06-27	0	0	1	2007-06-25	112.6	0.93
6035xxxx	51	0	1	2007-03-30	2	0	2	1	1	0	0	0	0	3	1	2	3	2007-05-30	0	0				2007-12-13	1	1	0		8.6	6.57
6035xxxx	61	1	1	2007-04-03	1	1	2	1	0	1	0	0	0	1	0		1	2007-04-19	0	0				2016-06-27	0	0	0		112.43	111.9
6035xxxx	63	1	1	2007-05-29	4	0	2	1	0	0	0	1	1	1	0		1	2007-05-30	0	0				2012-01-12	1	0	0		56.3	56.27
6036xxxx	62	1	1	2007-10-12	2	0	2	1	0	1	1	0	1	3	1	2	3	2007-11-08	2	0				2010-06-26	1	0	0		32.93	32.03
6036xxxx	48	0	1	2007-07-07	1	1	2	1	1	1	0	0	0	1	0		1	2007-08-02	0	0				2009-03-15	1	0	0		20.57	19.7
6036xxxx	42	0	1	2007-06-08	2	0	2	1	1	0	0	0	0	1	0		1	2007-07-11	0	0				2009-02-24	1	1	1	2008-02-04	20.9	6.93
6036xxxx	79	1	1	2007-07-03	1	1	2	1	1	1	0	1	1	1	0		1	2007-08-04	0	0				2009-10-17	1	0	0		27.9	26.83
6036xxxx	76	1	0	2007-06-29	1	1	2	0	0	0	0	0	0	1	0		1	2007-07-25	0	0				2012-08-10	0	0	0		62.3	61.43
6036xxxx	74	1	1	2007-07-27	1	1	1	0	0	0	0	0	0	1	0		1	2007-07-30	0	0				2016-06-13	0	0	0		108.13	108.03
6036xxxx	47	0	1	2007-07-30	2	0	2	1	1	1	0	0	0	1	1	2	3	2007-08-08	2	0				2013-08-10	1	1	1	2013-03-11	73.43	68.07
6037xxxx	54	0	1	2007-09-03	2	0	1	1	1	1	0	0	0	1	1	1	3	2007-10-04	2	0				2015-10-23	0	0	0		99.07	98.03
6037xxxx	61	1	1	2008-02-22	1	1	1	1	0	1	0	0	0	1	0		1	2008-03-13	0	1		1		2014-05-02	0	0	0		75.37	74.7
6037xxxx	56	0	1	2007-08-28	1	1	2	0	0	0	0	0	0	3	1	1	3	2008-01-09	2	0				2016-07-06	0	0	0		107.83	103.37
6037xxxx	82	1	1	2007-11-07	1	1	2	1	0	0	0	0	0	1	0		1	2007-11-19	0	0				2016-06-02	0	0	0		104.33	103.93
6038xxxx	41	0	1	2007-09-27	4	0	2	1	0	0	0	0	0	1	1	1	3	2007-10-17	2	0				2016-06-17	0	0	0		106.2	105.53
6038xxxx	78	1	1	2007-11-23	4	0	1	0	0	0	0	0	0	3	0		3	2008-05-12	0	0				2015-09-15	0	0	1	2008-08-04	95.1	2.8
6038xxxx	48	0	1	2008-01-14	1	1	2	1	1	1	0	0	0	1	0		1	2008-01-16	0	0				2016-06-17	0	0	0		102.57	102.5
6040xxxx	74	1	1	2008-09-02	1	1	2	0	0	0	0	0	0	1	0		1	2008-09-18	0	1	1			2014-12-26	0	0	0		76.87	76.33
6040xxxx	58	0	1	2008-05-09	1	1	2	1	0	1	0	0	0	1	0		1	2008-05-12	0	0				2016-06-30	0	0	0		99.13	99.03
6040xxxx	83	1	1	2008-06-13	2	0	2	0	0	0	0	0	0	1	1	1	3	2008-07-10	0	1			1	2011-12-01	1	0	0		42.2	41.3
6040xxxx	50	0	1	2008-07-05	1	1	2	0	0	1	0	0	0	1	0		1	2008-07-30	0	0				2016-02-25	0	0	0		93.03	92.2
6041xxxx	62	1	1	2008-07-11	1	1	2	1	0	0	0	0	0	1	0		1	2008-08-18	0	0				2014-12-25	0	0	0		78.6	77.33
6042xxxx	79	1	1	2008-10-24	1	1	2	0	0	0	0	0	0	1	0		1	2008-11-12	0	1	1			2015-07-31	0	0	0		82.37	81.73
6042xxxx	61	1	1	2008-09-20	1	1	2	1	1	0	0	0	0	3	0		3	2008-10-08	0	1	1			2016-04-08	0	0	0		91.9	91.3
6042xxxx	65	1	1	2009-02-18	4	0	1	1	1	0	0	0	1	3	0		3	2009-03-19	2	0				2010-09-05	1	0	0		18.8	17.83
6043xxxx	44	0	1	2009-01-02	1	1	2	1	1	1	0	0	0	1	0		1	2009-01-08	0	0				2016-03-01	0	0	1	2009-05-07	87.17	3.97
6043xxxx	50	0	1	2009-03-13	2	0	1	1	1	1	0	0	0	3	1	2	3	2009-03-16	0	0				2016-06-29	0	0	0		88.83	88.73
6044xxxx	51	0	1	2009-02-26	2	0	2	1	1	1	0	0	0	3	0		3	2009-03-17	2	0				2016-05-30	0	0	0		88.33	87.7
6045xxxx	61	1	1	2009-06-03	2	0	2	1	1	1	0	0	0	1	1	2	3	2009-07-02	2	0				2010-07-01	1	1	1	2010-01-05	13.1	6.23
6045xxxx	48	0	1	2009-06-12	2	0	2	1	1	1	1	0	1	3	1	2	3	2009-06-30	2	0				2016-06-14	0	0	0		85.3	84.7
6045xxxx	77	1	1	2009-06-23	2	0	2	1	0	1	0	0	0	1	0		1	2009-07-16	0	0				2012-11-14	1	0	0		41.33	40.57
6046xxxx	45	0	1	2009-08-31	2	0	2	1	1	1	0	0	0	3	0		3	2009-09-08	0	0				2015-02-04	0	0	0		66.1	65.83
6047xxxx	56	0	1	2009-11-11	2	0	2	1	1	1	0	0	0	1	1	1	3	2010-02-03	2	0				2010-12-15	1	1	0		13.3	10.5
6047xxxx	56	0	1	2009-12-18	1	1	1	1	1	1	0	0	0	1	0		1	2010-01-12	0	0				2016-03-10	0	0	0		75.8	74.97
